RESEARCH ARTICLE

# Beyond Emotional and Spatial Processes: Cognitive Dysfunction in a Depressive Phenotype Produced by Long Photoperiod Exposure

Abigail K. Barnes<sup>1,2</sup>, Summer B. Smith<sup>2</sup>, Subimal Datta<sup>1,2,3\*</sup>

**1** Department of Anesthesiology, Graduate School of Medicine, The University of Tennessee, Knoxville, TN, United States of America, **2** Department of Psychology, College of Arts and Sciences, The University of Tennessee, Knoxville, TN, United States of America, **3** Program in Comparative and Experimental Medicine, College of Veterinary Medicine, The University of Tennessee, Knoxville, TN, United States of America

\* [sdatta1@utk.edu](mailto:sdatta1@utk.edu)

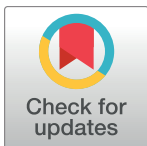

**OPEN ACCESS**

**Citation:** Barnes AK, Smith SB, Datta S (2017) Beyond Emotional and Spatial Processes: Cognitive Dysfunction in a Depressive Phenotype Produced by Long Photoperiod Exposure. PLoS ONE 12(1): e0170032. doi:10.1371/journal.pone.0170032

**Editor:** Tiziana Rubino, Università degli Studi dell'Insubria, ITALY

**Received:** October 10, 2016

**Accepted:** December 27, 2016

**Published:** January 6, 2017

**Copyright:** © 2017 Barnes et al. This is an open access article distributed under the terms of the [Creative Commons Attribution License](https://creativecommons.org/licenses/by/4.0/), which permits unrestricted use, distribution, and reproduction in any medium, provided the original author and source are credited.

**Data Availability Statement:** All relevant data are within the paper.

**Funding:** This work is supported by the National Institutes of Health Research Grant MH59839. The funder had no role in the study design, data collection and analysis, decision to publish, or preparation of the manuscript.

**Competing Interests:** The authors have declared that no competing interests exist.

## Abstract

Cognitive dysfunction in depression has recently been given more attention and legitimacy as a core symptom of the disorder. However, animal investigations of depression-related cognitive deficits have generally focused on emotional or spatial memory processing. Additionally, the relationship between the cognitive and affective disturbances that are present in depression remains obscure. Interestingly, sleep disruption is one aspect of depression that can be related both to cognition and affect, and may serve as a link between the two. Previous studies have correlated sleep disruption with negative mood and impaired cognition. The present study investigated whether a long photoperiod-induced depressive phenotype showed cognitive deficits, as measured by novel object recognition, and displayed a cognitive vulnerability to an acute period of total sleep deprivation. Adult male Wistar rats were subjected to a long photoperiod (21L:3D) or a normal photoperiod (12L:12D) condition. Our results indicate that our long photoperiod exposed animals showed behaviors in the forced swim test consistent with a depressive phenotype, and showed significant deficits in novel object recognition. Three hours of total sleep deprivation, however, did not significantly change novel object recognition in either group, but the trends suggest that the long photoperiod and normal photoperiod groups had different cognitive responses to total sleep deprivation. Collectively, these results underline the extent of cognitive dysfunction present in depression, and suggest that altered sleep plays a role in generating both the affective and cognitive symptoms of depression.

## Introduction

Depression is traditionally an “affective” disorder, but the emotional disturbances associated with depression do not completely encompass all of its disabling aspects [1–3]. There are cognitive dysfunctions also present in depression, which have been shown to persist even when

the affective symptoms are in remission, and worsen with every depressive episode [2,4,5]. This implies two things: one, the cognitive and affective aspects of depression are independent of each other, and two, the neural underpinnings of depression might persist even if affective symptoms aren't displayed. Targeting the cognitive deficits associated with depression thus seems key to treatment of the disorder, yet the mechanisms underlying these cognitive deficits are not well understood.

Insomnia, poor sleep quality, and altered sleep architecture are well-known characteristics of depression [6–10]. It is also well-known that sleep loss and sleep restriction negatively affect cognition [11–14]. Interestingly, there seems to be some overlap between the brain regions affected by sleep loss and the brain regions known to be dysfunctional in depressive phenotypes, such as the medial prefrontal cortex and the hippocampus [15–19]. However, sleep deprivation can also have antidepressant effects in some patients, and has been shown to improve cognitive abilities in some cases [20–24]. The relationship between sleep loss and depression-related cognitive deficits is, therefore, still relatively obscure.

Animal investigations of depression-related cognitive deficits have applied tasks involving aversive or reinforcing stimuli, but, in humans, depressed patients show altered processing of punishment and reward cues [20,25–29]. Therefore, these tasks could report learning and memory deficits that are actually due to altered punishment and reward processing. The novel object recognition (NOR) task is a well-established and simple behavioral assay of memory that relies on rodents' natural tendency to explore novel things, without externally applied rules or reinforcement [30,31]. Relative to tasks that measure the exploration of novel environments or of a single novel object, the discrimination of novelty versus familiarity requires more cognitive skills from the subject [30]. The NOR task is well-suited for studying depression-related cognition, because it does not employ any emotional responses, thus providing a relatively clear measure of memory and cognition.

Other studies of depression-related cognitive deficits have primarily used spatial memory tests, such as the Morris water maze, the Y-maze, or the novel object location recognition test [25–27,29]. There is some assumption that the cognitive deficits seen in depression are linked with the reduced neurogenesis seen in depressed patients [32–35]. Measures of depression-related cognition have focused, therefore, on spatial processes, because they are hippocampal-dependent [36–40]. However, spatial memory deficits do not fully encompass the cognitive dysfunction seen in depressed patients [2,3,5,29]. Novel object recognition (NOR) has been shown to rely on structures distinct from the hippocampus, and is considered a cognitive, not spatial task [41–44]. To our knowledge, very few studies of depression-related cognitive deficits have used an NOR paradigm to measure cognition [45–48]. Additionally, almost all of these studies involved chronic mild stress, which can lead to novelty-induced anxiety [49,50]. Therefore, the deficits reported could, again, be traced back to altered emotional responses. Interestingly, NOR has been frequently used to study physical conditions that involve cognitive deficits and are comorbid with depression, such as Alzheimer's disease, Gulf War illness, drug abuse, and menopause [51–55]. The fact that depression is comorbid with so many conditions involving cognitive dysfunction suggests that cognitive dysfunction may precede or contribute to the development of depression. All of this strengthens the need to broaden the investigation of cognitive deficits seen in animal models of depression.

The present study was designed to develop an animal model of depression-related cognitive deficits that did not involve pharmacological manipulations, painful stimuli, early life stress, or punishment and reward, all of which can provide confounding variables when studying cognition. Exposing nocturnal animals to long photoperiods (LPP) has been shown to induce a depressive phenotype [56,57]. Long photoperiod exposure is considered a model of seasonal affective disorder, which involves recurring depressive episodes that coincide with seasonal

variations in sunlight [58]. LPP exposure generates many changes in cellular and behavioral rhythms, and is thought to induce depression via modulation of neurons in the para- and periventricular nuclei of the hypothalamus [57,59–61]. These neurons form connections with neurons that release CRF into the third ventricle, potentially increasing cortisol, which correlates with depression. Importantly, however, the increased cortisol from LPP exposure is not associated with any novel environmental or cued stimuli, limiting the confounding impacts it has on responses to novelty.

We exposed nocturnal Wistar rats to LPP, and used the NOR task to investigate cognitive function. To measure affective behaviors, we used the elevated plus maze (EPM) and forced swim test (FST). Furthermore, this model was used to investigate how acute (3 h) total sleep deprivation (TSD) interacts with depression-related cognitive deficits. Our lab has shown the 3 h of sleep deprivation is sufficient to induce molecular and behavioral changes [62]. In addition, the first few hours of sleep after learning has occurred have been shown to be a critical window for memory consolidation [14]. We hypothesized that animals exposed to long photoperiods would show a depressive phenotype and impaired NOR performance, and that TSD would compound this effect to produce further NOR impairments. The results show that LPP exposure did produce a depressive phenotype that suffered from NOR impairments, indicating some amount of cognitive dysfunction. However, TSD did not compound this effect, indicating a complicated relationship between depression-related cognition and sleep loss.

## Materials and Methods

### Subjects and housing

The subjects were 16 adult male Wistar rats, weighing between 250–275g and housed individually in a home cage with *ad libitum* access to food and water. Ambient temperatures were maintained at 25–27°C and, unless otherwise specified, animals were kept in a 12L:12D cycle (lights on at 6:00 am, lights off at 6:00 pm). While lights were on, light at cage levels was between 200–250 lux. Prior to any experimental procedures, animals were each handled 5 minutes for 5 consecutive days to habituate the animals to experimenter handling. During long photoperiod exposure, animals were kept in a 21L:3D cycle (lights off at 6:00 pm, lights on at 9:00 pm). While lights were on, light at cage levels was kept between 225–250 lux. The housing conditions of the LPP exposed animals were otherwise identical to control housing conditions.

### Experimental design

All procedures were performed in accordance with the NIH Guide for the Care and Use of Laboratory Animals and approved by the University of Tennessee Animal Care Committee (Protocol Number: 2349-UTK). The 16 rats were separated into two groups of eight: a normal photoperiod (NPP) control group and a long photoperiod (LPP) group. Fig 1 summarizes the experimental design. All behavioral tests were performed during the animals' light phase. During the first week, both groups were housed in a 12L:12D cycle and underwent a 4-day Novel Object Recognition (NOR) paradigm to determine baseline NOR performance. After the baseline week, the LPP group was transferred to LPP housing conditions, while the NPP group remained in a 12L:12D cycle. Animals were kept in their respective light cycles for the remainder of the experiment, and were handled at least three times a week for 5 minutes each to keep them familiar with experimenter handling.

During the fourth week of experimental procedures, after two weeks of exposure to their respective light cycles, animals underwent another 4-day NOR paradigm. On the second day of that same week, each animal was tested for anxiety-related behaviors in the Elevated Plus Maze (EPM). On the fifth day, each animal was subjected to a Forced Swim Test (FST) to

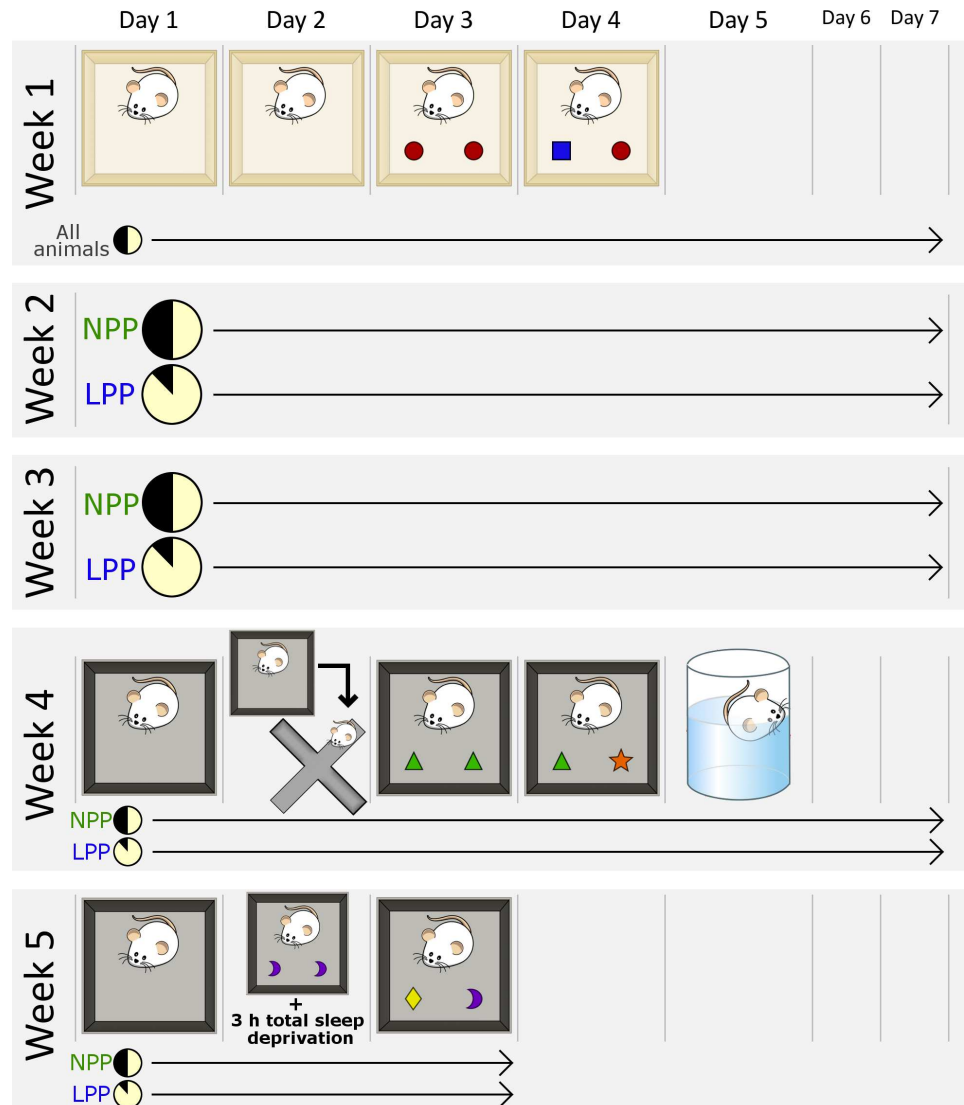

**Fig 1. Experimental design and timeline.** Week 1: All animals are kept in a 12L:12D cycle. Animals are habituated to the testing chamber for two days. On the third day, two identical objects are placed in the chamber, and the animal is allowed to familiarize with them for 10 minutes. On the fourth day, one familiar object is replaced with a novel object, and animals are allowed to freely explore for 2 minutes. Weeks 2 and 3: Group 1 is kept in a 12L:12D cycle; group 2 is housed in a 21L:3D cycle. Week 4: While being maintained on their respective light cycles, all animals undergo another NOR task. The context of the testing chamber is different from that of Week 1. The four-day NOR protocol is identical to that of Week 1, except that, after the second habituation, animals are placed in the elevated plus maze for 5 minutes. On the fifth day, animals undergo a 5 minute forced swim test. Week 5: Animals undergo another NOR task. The context of the testing chamber remains the same as Week 4. This NOR protocol is also identical to that of Week 1, except that, directly after the familiarization phase, animals are totally sleep deprived for 3 hours.

doi:10.1371/journal.pone.0170032.g001

examine depression-related behaviors. During the fifth and final week, animals were tested in an additional NOR task, which involved a 3 h total sleep deprivation (TSD) procedure. It should be noted that, after each behavioral test, animals were immediately returned to their home cages and left undisturbed for the rest of the day, which allowed minimal sleep disruption. Two days after the final NOR test, animals were euthanized with overdose of isoflurane.

## Novel object recognition

The testing chamber for the NOR paradigm was a 60 cm x 60 cm x 45 cm open box. A visual reference cue was placed on one wall of the chamber. For the first NOR task, the chamber had a large right-pointing arrow on one wall, and the black floor was separated into four equal segments by thin white lines forming a cross. For the second and third NOR tasks, two smaller upwards-pointing arrows replaced the large arrow, and the black floor was covered in thin white pin stripes. At the beginning of each exposure, animals were always placed in the lower right-hand corner of the chamber, across from the visual reference cue. The testing chamber was always wiped clean with Quatricide after an animal was exposed to it, to remove olfactory cues. After animals were removed from the chamber, they were returned to their home cage and left undisturbed, unless otherwise specified.

The NOR procedure consisted of a habituation phase, a familiarization phase, and a testing phase. Each phase of the NOR procedure began on separate, sequential days at 10:00 am. All animals from a group went through each phase on the same day, but individually and sequentially, such that the second animal went after the first had finished, the third went after the second, etc. Animals always went in the same order, so that each phase of the paradigm was administered in 24-hour intervals for each animal. Each animal's behavior during all phases was videotaped from directly above the chamber, to be analyzed at a later time.

The objects used in the NOR task were brightly colored geometric shapes (Geosolids, Learning Resources, Vernon Hills, Illinois, USA), secured to the floor so they could not be moved. The placement of the objects was counterbalanced within groups and across the three separate tasks, to minimize the confounding effects of location preference and olfactory cues. Familiarization with the objects was also counterbalanced, such that half of the animals in each group were familiarized with Object A and tested with Object B, and half were familiarized with Object B and tested with Object A. The objects were always wiped clean with Quatricide after an animal was exposed to them, to remove olfactory cues. Each of the three NOR tasks that the animals underwent involved completely different object pairs, so that no objects were ever encountered in more than one task.

For the first two NOR tasks, there were two days of habituation to the testing chamber. During these habituations, the animals were placed in the testing chamber and allowed to freely explore for 15 minutes on the first day, and 10 minutes on the second day. The familiarization phase began on the third day. For this phase, two identical objects were placed in adjacent corners of the chamber. Once the objects were in the testing chamber, animals were placed in the chamber and allowed to freely explore for 10 minutes. The testing phase began on the fourth day. For this phase, one of the identical objects from the familiarization phase was replaced with a different, novel object, which was also a geometric shape with an approximately equal volume. This novel object was secured to the same location as the familiar object had been on the previous day. Animals were allowed to freely explore the chamber and objects for 5 minutes.

The procedure for the third NOR task was nearly identical, except that animals were only habituated for one day because the context of the chamber was not novel, and the animals were subjected to total sleep deprivation for 3 hours immediately following the familiarization phase. The context of the chamber was not changed to ensure that any recognition deficits that were observed could not be attributed to a lack of memory for the context.

## Elevated plus maze

The EPM testing apparatus was a cross-shaped platform raised 70 cm above the ground. Each arm of the cross was 10 cm wide and 45 cm long. The center of the maze was a 10 cm x 10 cm

square, which had open access to all four arms of the cross. The maze consisted of two open arms and two closed arms. The closed arms were two opposing arms of the cross that had 50 cm high walls on the three outer edges that were not facing the center. The two open arms had 2 cm high walls, also on the three outer edges, which prevented animals from slipping off.

Animals were subjected to the EPM after the 2-week photoperiod exposure. On the second day of the NOR paradigm, immediately following the 10 min NOR chamber habituation, animals were removed from the NOR chamber and placed in the center of the EPM, facing one of the closed arms, and allowed to freely explore for 5 minutes. The NOR chamber was thus used to habituate the animals to walking on a hard, flat surface, which has been reported to affect animals' performance in the EPM. Each animal's performance was videotaped from the side of the maze, with a clear view of the open arms, and then analyzed at a later time. The EPM was wiped clean with Quatricide after each animal's exposure.

### Forced swim test

The FST testing chamber was a clear acrylic cylinder with one open end, and was 30 cm in diameter and 55 cm tall. The FST was administered after the 2-week photoperiod exposure, 24 h after the completion of the second NOR paradigm. Prior to testing, the cylinder was filled with water to a depth of 35 cm and at a temperature between 25–27°C. Then, animals were gently placed into the water one at a time and left in the chamber for 5 minutes. The water was changed after each test. Each animal's performance in the FST was filmed from the side of the chamber, which allowed good visualization of movement through the clear acrylic. Videos were analyzed at a later time.

### Total sleep deprivation

Immediately after the familiarization phase of the third NOR paradigm, each animal was removed from the NOR chamber and returned to their home cage. Then, they were taken to a different room where two investigators performed a 3 h TSD procedure. The start time of this procedure varied with each animal, because each animal had started the NOR familiarization individually and sequentially. Accordingly, the last animal began TSD approximately two hours after the first, with intervening animals beginning 10–15 minutes apart. The total sleep deprivation procedure consisted of a few minutes of gentle handling whenever an animal began to sleep. Sleep was identified when the animal was laying with its head down and its eyes closed. Animals remained in their home cages, with *ad libitum* access to food and water, throughout the procedure. Once its 3 h deprivation period had ended, each animal's cage was returned to its normal housing location.

### Analysis and statistics

All of the NOR videos were scored using EthoVision XT software (Noldus Information Technology, Wageningen, The Netherlands). Only the first two minutes of the test phase, or the first five minutes of all other phases were analyzed, because that is the time period during which rats have been shown to be the most sensitive to novelty [44,63]. The EthoVision software allowed for automatic tracking and scoring, which removes human bias. During the habituation phases, total distance traveled was calculated by EthoVision's center-point tracking software. During the test and familiarization phases, object exploration was defined as an animal's nose being < 2 cm from the object. The EthoVision software calculated total object exploration, based on this definition, by tracking each animal's nose-point. The total object exploration times of each animal were exported to Excel, which was used to calculate the Recognition Index. The Recognition Index (RI) is a percentage defined as the amount of time an

animal spent exploring the novel object ( $T_N$ ) divided by the time the animal spent exploring the familiar object ( $T_F$ ) and the novel object:  $RI = T_N / (T_N + T_F)$ .

The EPM and FST videos were manually scored using Observer XT software (Noldus Information Technology, Wageningen, The Netherlands). An investigator blinded to the experimental conditions scored each video. EPM videos were analyzed for time spent in the open and closed arms, which were visually determined by whether or not the animal had all four paws in the open arm. FST videos were analyzed for time spent swimming, climbing and immobile. Immobility was determined when all four paws stopped moving or only the back paws were moving a minimal amount to keep the animal afloat. Swimming was determined when all four paws were treading water. Climbing was determined when all four paws were treading, and both of the animal's forepaws were completely above water.

Statistical analyses were performed using GraphPad Prism (GraphPad Software, Inc., La Jolla, California, USA). The FST and EPM behavioral data of the NPP and LPP groups were compared using unpaired t-tests, to investigate the effects of LPP exposure on anxiety and depression-related behaviors. The total distance travelled by each group during the initial context habituation of each NOR paradigm was analyzed with a two-way ANOVA, to investigate the effects of LPP exposure and TSD on locomotive activity and sensitivity to novelty. Two-way ANOVAs were also used to compare the object exploration times of both groups across time, and the RI's of both groups across time, to investigate the effects of LPP exposure and TSD on NOR performance. Statistical significance was determined when  $p < 0.05$ . If significant differences were found in two-way ANOVAs, one-way ANOVAs (Tukey's multiple comparisons tests) were performed to compare data both within and between groups.

## Results

To ensure that no differences between groups appeared at baseline, we ran an unpaired t-test to compare the baseline NOR performances (measured by RI values) of both groups. As shown in Fig 2, the average RI's of both groups at baseline were nearly identical (Fig 2C; NPP:  $70.4 \pm 5.7$  [mean  $\pm$  SEM]; LPP:  $71.1 \pm 3.4$ ,  $t = 0.11$ ,  $df = 14$ ,  $p = 0.91$ ), indicating no preexisting group differences. However, both groups had scores of about 70%, indicating that both groups were capable of novel object discrimination at baseline, before any experimental manipulations. The data presented in Fig 2A and 2B support this conclusion, showing that, in both groups, the time spent exploring the familiar object was much lower than the time spent exploring the novel object during the baseline NOR test. Fig 2 also shows that, at baseline, both groups spent very similar amounts of time exploring familiar (Fig 2A; NPP:  $3.7 \pm 1.0$ ; LPP:  $3.6 \pm 0.6$ ,  $p > 0.05$ ) and novel (Fig 2B; NPP:  $10 \pm 2.7$ ; LPP:  $10 \pm 2.7$ ,  $p > 0.05$ ) objects, indicating no preexisting differences in exploratory behaviors.

### Long photoperiod exposure produces deficits in novel object recognition

The two-way ANOVA of group NOR performance (measured by RI values) across the three NOR paradigms revealed significant effects of group ( $F_{(1,14)} = 6.94$ ,  $p = 0.02$ ), time ( $F_{(2,28)} = 8.72$ ,  $p = 0.001$ ), and an interaction effect ( $F_{(2,28)} = 3.41$ ,  $p = 0.05$ ). The two-way ANOVA of novel object exploration across the different time points revealed no significant effects, but the two-way ANOVA of familiar object exploration indicated a significant effect of time ( $F_{(2,28)} = 13.16$ ,  $p < 0.001$ ) and group ( $F_{(1,14)} = 6.92$ ,  $p = 0.02$ ). Collectively, this data indicates that NOR performance varied within groups across the three NOR paradigms, and between the NPP and LPP groups at certain time points. Also, time spent exploring the novel object did not change across time or between groups, but familiar object exploration did change significantly. Since

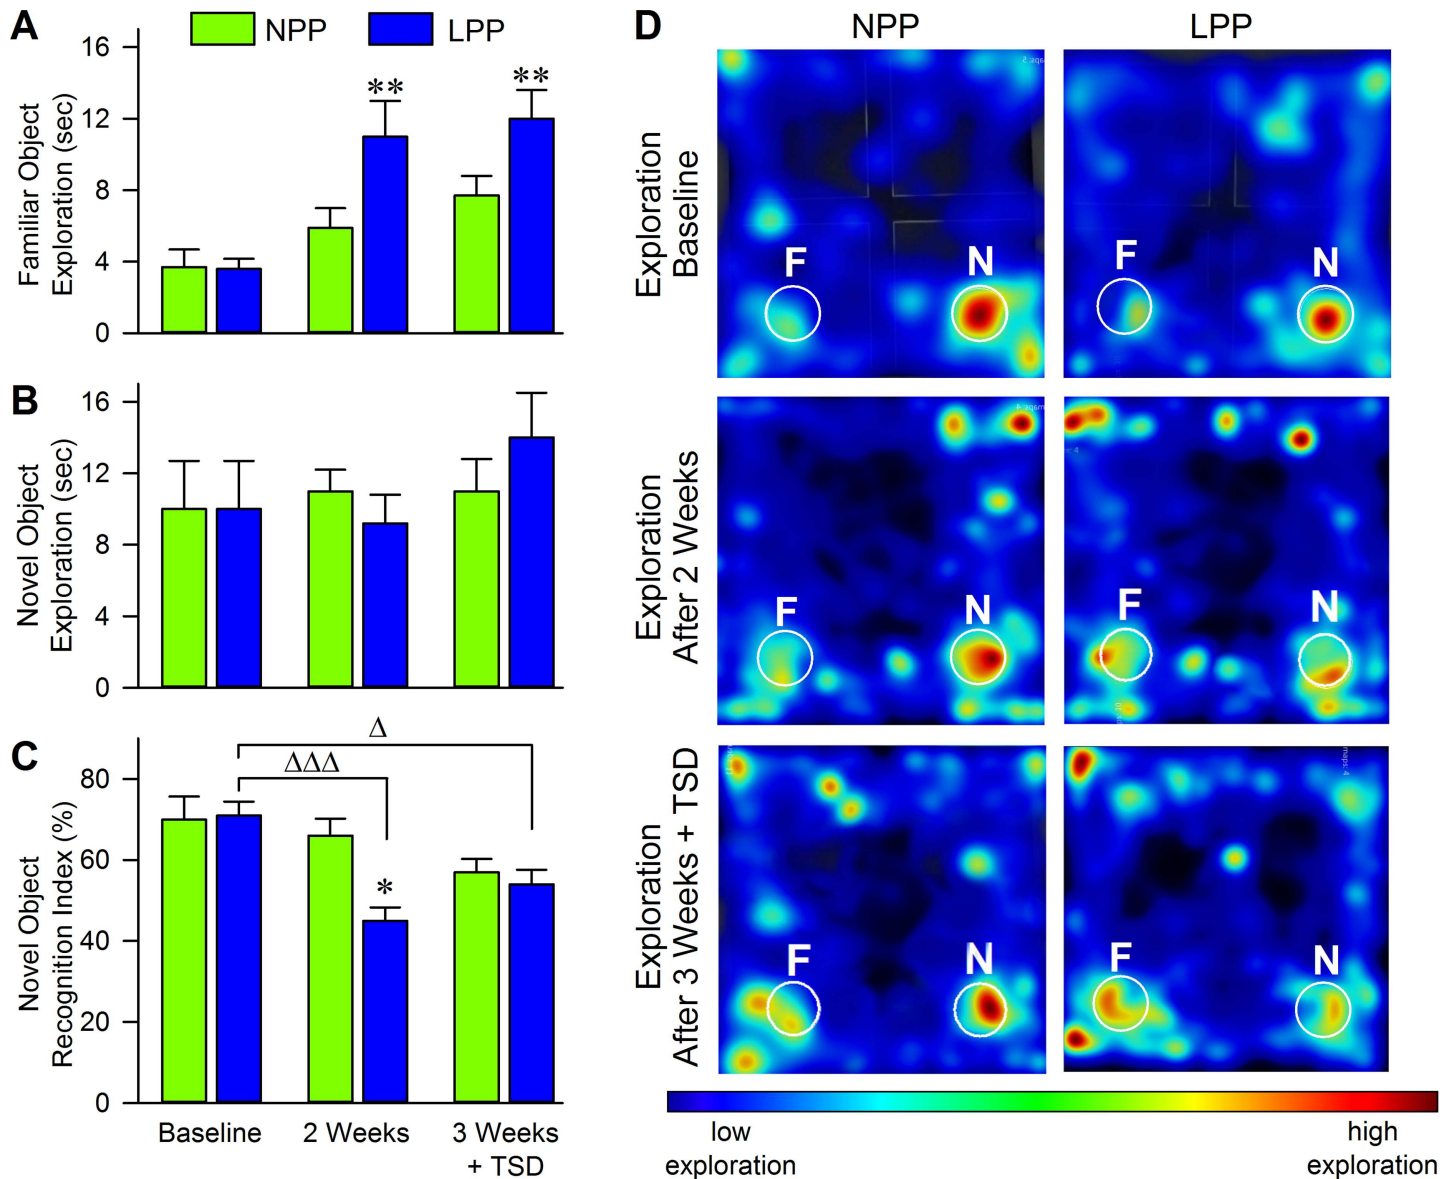

**Fig 2. Long photoperiod exposure negatively impacted novel object recognition by increasing familiar object exploration while sleep deprivation balanced performance between groups.** Figures showing (A) average (mean  $\pm$  SEM) time spent exploring familiar objects and (B) average time spent exploring novel objects. Notice that, after exposure to a LPP cycle, animals spent significantly more time exploring the familiar object during the test phase, which corresponds with a lack of recognition. Histograms in (C) plot each group's average (mean  $\pm$  SEM) Recognition Index, calculated as time spent exploring the novel object divided by the time total time spent exploring both novel and familiar objects. Notice that, after a 2 week exposure to their respective light cycles, the LPP group had significantly reduced recognition of the novel object compared to its baseline performance. After a three week exposure to respective light cycles and 3 h TSD following the familiarization phase, the LPP group still showed deficits in novel object recognition compared to its baseline performance, but their average RI was increased compared to 2 weeks LPP treatment without TSD. After 3 h TSD, the NPP group showed reduced novel object recognition, but the reduction proved to be insignificant. However, notice that the performances of each group become relatively equivalent after 3 h TSD. Exemplary heat maps shown in (D) plot nose-point exploration time during the test phases at each time point. Heat maps are plotted in a color spectrum from blue to red, with red indicating a high amount of time spent in the specified area. Circles labeled "N" and "F" indicate novel and familiar object locations, respectively. Notice the lack of discrimination between familiar and novel objects after LPP exposure. Asterisks indicate the levels of statistical significance (Tukey's multiple comparisons test) of the differences between the NPP and LPP groups: \* $p < 0.05$ , \*\* $p < 0.01$ . Delta indicates the level of statistical significance of the differences in the LPP group at different time points:  $\Delta p < 0.05$ ,  $\Delta\Delta p < 0.001$ . Abbreviations: NPP, normal photoperiod; LPP, long photoperiod.

doi:10.1371/journal.pone.0170032.g002



no preexisting group differences were found, we were confident that the significant variation found by the two-way ANOVAs was due to LPP exposure, TSD, or both treatments.

One-way ANOVAs (Tukey's multiple comparisons tests) revealed that, after the 2-week exposure period, the LPP group had significant deficits in novel object recognition, as shown in Fig 2. The animals in this group averaged a RI of  $45.4 \pm 3.3$ , which is a null score, indicating little preference between the novel and familiar objects (Fig 2C). This was significantly lower than their baseline performance ( $71.1 \pm 3.4$ ,  $p < 0.001$ ), and was significantly lower than the average RI of the NPP group at the same 2-week time point ( $65.5 \pm 4.2$ ,  $p < 0.05$ ). Importantly, the RI of the NPP group did not significantly change from baseline performance (Fig 2C; 2 weeks:  $65.5 \pm 4.2$ ; baseline:  $70.4 \pm 5.7$ ,  $p > 0.05$ ), indicating that LPP exposure was likely involved in the NOR deficits seen in the LPP group. Interestingly, the LPP group did not show decreased object exploration. Instead, the exploration of the familiar object was increased compared to the group's baseline performance (Fig 2A; 2 weeks:  $11.2 \pm 2.0$ ; baseline:  $3.6 \pm 0.6$ ;  $p < 0.01$ ). This suggests that LPP exposure correlated with impairments in novel object recognition, but did not impact general object exploration.

### Three hours of total sleep deprivation has minimal but distinct effects on normal photoperiod vs long photoperiod exposed animals

In contrast to a number of other studies, TSD did not significantly impact NOR performance in either group [12,64–66]. Fig 2C shows that, after TSD, the NPP group exhibited a decreased average RI compared to its baseline, but the decrease did not reach significance (Tukey's multiple comparisons, 3 weeks + TSD:  $57.0 \pm 3.3$ ; baseline:  $70.4 \pm 5.7$ ,  $p > 0.05$ ). The average RI of the LPP group after TSD remained significantly lower than its baseline performance (Fig 2C; 3 weeks + TSD:  $53.8 \pm 3.6$ ; baseline:  $71.1 \pm 3.4$ ,  $p > 0.05$ ). Interestingly, however, the LPP group's average RI after TSD was higher than their average RI after LPP exposure without TSD, although this increase did not reach significance (Fig 2C; 3 weeks + TSD:  $53.8 \pm 3.6$ ; 2 weeks:  $45.4 \pm 3.3$ ,  $p > 0.05$ ).

The data presented in Fig 2A and 2B support the RI plots, showing that, compared to baseline, the NPP group had increased exploration of the familiar object after TSD, but the increase was not significant (Fig 2A; 3 weeks + TSD:  $7.7 \pm 1.1$ ; baseline:  $3.7 \pm 1.0$ ,  $p > 0.05$ ). Collectively, this suggests that 3 h of TSD after familiarization with two identical objects may have slightly impaired the memory of the objects, but animals were still able to discriminate between the familiar and novel object in the testing phase. Interestingly, the LPP group showed an increase in exploration of the novel object, though this too was insignificant (Fig 2B; 3 weeks + TSD:  $9.2 \pm 1.6$ ; 2 weeks:  $14 \pm 2.5$ ,  $p > 0.05$ ). This suggests that TSD did not compound the effects of LPP exposure. Instead, TSD may have mitigated some of the effects of LPP exposure that produced NOR impairments.

### Long photoperiod exposure increases depressive, but not anxious behaviors

We investigated the effects of LPP exposure on helpless behavior by comparing the NPP and LP groups' behavioral responses to the FST, which are summarized in Fig 3. Interestingly, the LPP group showed nearly twice as much immobility as the NPP group (LPP:  $37.5 \pm 4.7$ ; NPP:  $15.7 \pm 2.2$ ,  $t = 4.21$ ,  $df = 14$ ,  $p < 0.001$ ), and showed a corresponding decrease in swimming (LPP:  $42.1 \pm 3.9$ ; NPP:  $57.8 \pm 3.2$ ,  $t = 3.12$ ,  $df = 14$ ,  $p < 0.01$ ) and climbing (LPP:  $19.9 \pm 2.5$ ; NPP:  $26.1 \pm 2.3$ ,  $t = 1.89$ ,  $df = 14$ ,  $p = 0.08$ ). LPP exposure was therefore correlated with a significant decrease in active, and a significant increase in passive behaviors expressed in response

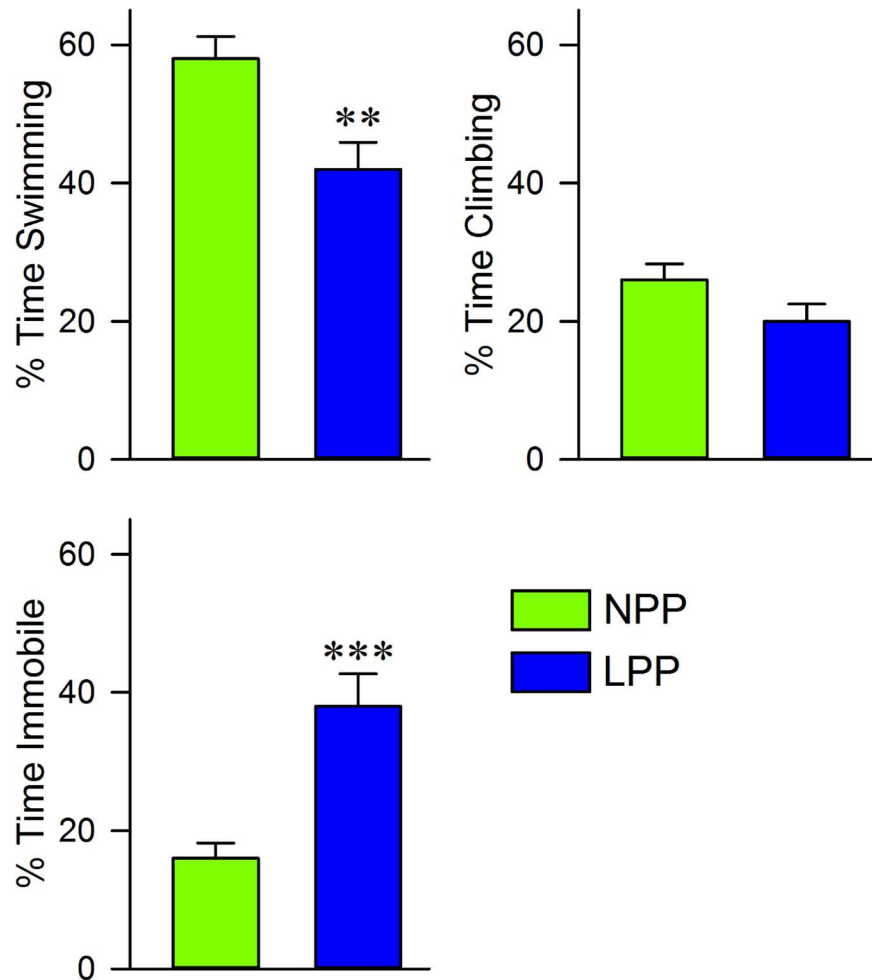

**Fig 3. Long photoperiod exposure decreased active behaviors in the forced swim test.** Histograms showing the average (mean  $\pm$  SEM) percent of time that each group spent swimming, climbing, or immobile during a 5 minute forced swim test, which was administered after a 2 week exposure to either NPP or a LPP cycle. Notice that the LPP group spent significantly more time immobile, and significantly less time swimming, than the NPP group. Also, there is a trend towards decreased time spent climbing in the LPP group compared to the NPP group. Collectively, these data indicate an overall reduction in active behaviors of the LPP group during the forced swim test. Asterisks indicate the levels of statistical significance (unpaired t-test) of the differences between the NPP and LPP groups: \*\* $p < 0.01$ , \*\*\* $p < 0.001$ . Abbreviations: NPP, normal photoperiod; LPP, long photoperiod.

doi:10.1371/journal.pone.0170032.g003

to a threat of drowning. This suggests that LPP exposure induced helplessness and behavioral despair.

In contrast, analysis of the anxious behaviors measured by the EPM did not reveal any significant differences between the NPP and the LPP groups, as shown in Fig 4A and 4B. Both groups spent nearly identical amounts of time in the open (NPP:  $27.6 \pm 5.9$ ; LPP:  $29.3 \pm 3.1$ ,  $t = 0.26$ ,  $df = 14$ ,  $p = 0.63$ ) and closed (NPP:  $72.2 \pm 6.1$ ; LPP:  $70.5 \pm 3.0$ ,  $t = 0.25$ ,  $df = 14$ ,  $p = 0.80$ ) arms of the maze. This implies that LPP exposure did not increase anxiety above baseline levels. The locomotive data collected during the first habituation of each NOR task, shown in Fig 4C, supports this conclusion. Since increased locomotive activity in a novel environment has been shown to be a sign of stress and/or novelty sensitivity, we looked to see if there were group differences in total distance traveled during the animals' first exposure to an environment. No

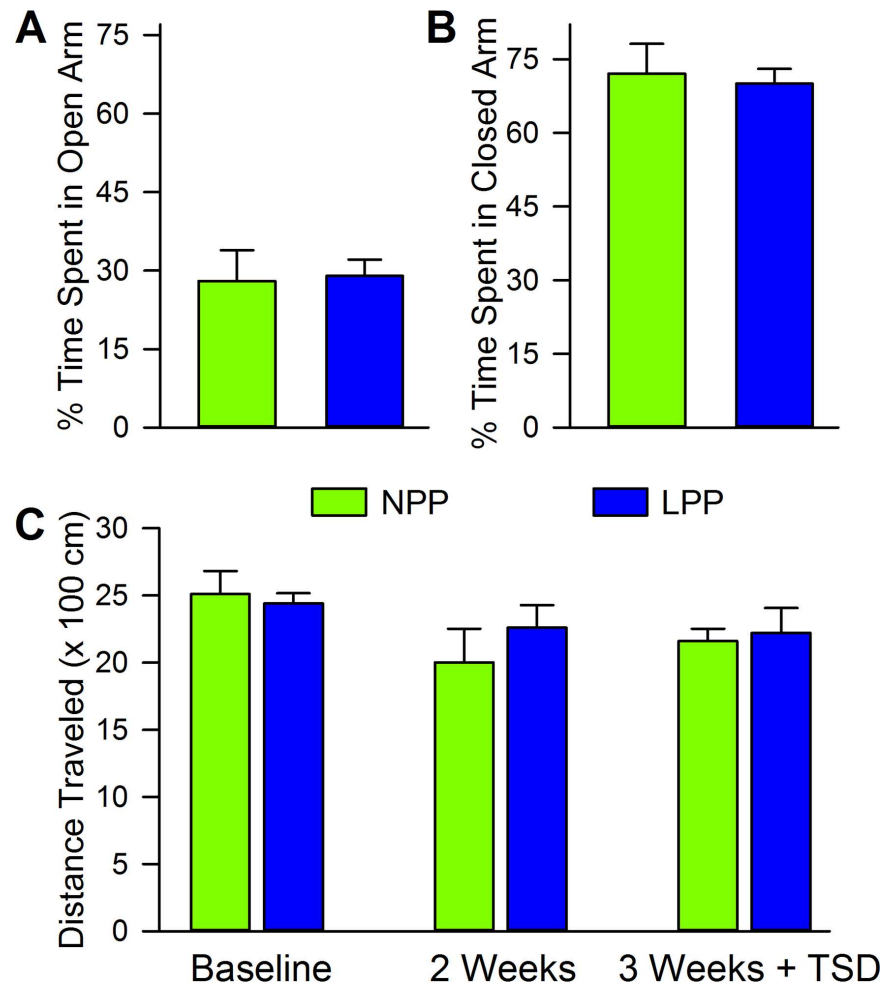

**Fig 4. Long photoperiod exposure did not produce anxious behaviors in the elevated plus maze or in a novel context.** Histograms showing the average (mean  $\pm$  SEM) percent of time that each group spent in the (A) open and (B) closed arms of the elevated plus maze, after a 2 week exposure to either NPP or LPP. Notice that there were no significant differences (unpaired t-test) in elevated plus maze performance were found between the two groups. Histograms showing (C) the average (mean  $\pm$  SEM) distance traveled by each group, during the first exposure to each new context in the NOR chamber. Note that there were no significant differences (unpaired t-test) in locomotion between the NPP and LPP groups at any time point. Abbreviations: NPP, normal photoperiod; LPP, long photoperiod.

doi:10.1371/journal.pone.0170032.g004

differences were found between groups or across time (two-way ANOVA, group:  $F_{(1,14)} = 0.18$ ,  $p = 0.68$ ; time:  $F_{(2,28)} = 3.06$ ,  $p = 0.06$ ; interaction:  $F_{(2,28)} = 0.61$ ,  $p = 0.55$ ), indicating that LPP exposure did not seem to increase sensitivity to novelty or stress. Collectively, the data suggests that LPP exposure increased helpless, but not anxious behaviors.

## Discussion

The results of the present study indicate that, in Wistar rats, a LPP-induced depressive phenotype shows deficits in novel object recognition, and may have an altered cognitive response to total sleep deprivation. Our principal findings are that rats exposed to two weeks of LPP exhibited: 1) behavioral despair in the forced swim test; 2) unaltered behavioral responses to the elevated plus maze; 3) deficits in discriminating novel from familiar objects; and 4) limited alterations in cognitive responses to a 3 h episode of total sleep deprivation.

Behavioral despair in response to the threat of drowning is a classic assay of depression in animals [67,68]. Increased immobility in the FST is frequently used as an indication of behavioral despair [67]. The large increase in immobility exhibited by our LPP exposed rats during the FST suggests that LPP exposure induced a depressive phenotype. However, it is interesting that the LPP exposed group did not show a significant decrease in climbing behavior, which has been reported in other animal models of depression [69–71]. It is important to note that most forced swim procedures include a 10 or 15 minute pretest exposure, which our procedure did not [69,71,72]. Our results indicate that this pretest is not necessary to see significant behavioral despair, but serves to increase the sensitivity of the test. This is the probable explanation for why the animals that showed depressive behaviors did not show a significant reduction in climbing behavior. Regardless, swimming behavior was significantly reduced in our LPP exposed rats, and, coupled with the large increase in immobility, it is reasonable to conclude that LPP exposure induced depression.

The present study shows that a long photoperiod animal model of depression can exhibit cognitive deficits, which may be independent from hippocampal-dependent spatial processing, punishment/reward processing, and anxiety. Interestingly, NOR deficits can stem from two potential cognitive processes that are not easily disentangled. First, the memory of the familiar object needs to remain stable and accessible [42,43,73]. Second, the novel object stimulus needs to be successfully discriminated from the familiar object stimulus [30,43]. Additionally, many discussions of the NOR test have implied that the test relies on some inherent reward value that novelty has for rodents [30,43,74]. For this reason, we suspected that rats that showed depressive-like behaviors might show a reduced interest in novel objects, which would lead to less object exploration, as seen in one other study [48]. This reduction in object exploration would have created a weaker acquisition of object memories, thus producing NOR deficits. However, this reduction in object exploration was not seen. Instead, the animals that displayed depressive characteristics explored both the familiar and novel objects at an amount equal to the level of novel object exploration exhibited by our control animals. This suggests that the animals that showed depressive behaviors did not find novelty less appealing than control animals, and did not have deficits in general object exploration, which would have impaired object memory. After ruling out those two possibilities, the remaining explanations are that the animals that exhibited a depressive phenotype had problems consolidating memories or discriminating stimuli. Investigating the neural underpinning of these deficiencies could prove useful in treating depression.

Other studies involving depression induced by LPP exposure in nocturnal animals have found altered behavior in the EPM, indicating an increase in anxiety [57]. The present study found no such differences. There is one possible reason for this discrepancy: animals in the present study were placed in the NOR chamber prior to undergoing the EPM. There have been reports that placing animals in a novel environment before the EPM increases locomotion in the EPM, and therefore increases time in the open arms [75]. Although the NOR chamber exposure that occurred prior to the EPM was the animals' second exposure (animals had been exposed for 15 minutes the previous day), it is possible that the animals still felt some amount of novelty. However, as shown by our locomotion data, exposure to a novel environment did not produce significant differences between groups in locomotive behavior. Therefore, if locomotion was increased, it should have increased equally for both groups. If any differences in exploratory behavior in the EPM were going to be found, they would have been unaffected by increased locomotion. Thus, we are confident that our EPM results are accurate. While we will not conclude that our LPP exposed animals had no anxiety, it is reasonable to conclude that any anxiety they had did not produce the significant deficits in NOR. The NOR deficits seen are thus more confidently associated with cognitive dysfunction, not anxiety.

In addition to identifying cognitive dysfunction in an animal model of depression, we wanted to explore how sleep loss interacts with depression-related cognition. However, following a 3 h TSD procedure after the familiarization phase, no significant differences in NOR performance were detected in either group. It is possible that, because behavioral tests were performed during the animals' light cycle, animals had become accustomed to sleep deprivation, leading to reduced responses to our TSD procedure. However, the maximum length of tests was 15 minutes, and animals were left undisturbed both before and after. Animals were observed returning to sleep within 20 minutes of finishing a test. It is reasonable to assume that animals lost a maximum of 40 minutes of sleep, with most losing much less than that. Since rats usually sleep about 9 hours a day, rats lost approximately 7% of their total sleep, which is much less than a chronic sleep deprivation or sleep restriction procedure requires [76–78]. Therefore, we do not think that our animals would have been accustomed to significant sleep loss.

The fact that our control group did not exhibit any significant impacts of total sleep deprivation leads us to conclude that a 3 h TSD procedure was not sufficient to produce any significant changes. This is in contrast to other studies that have used longer periods (4–6 h) of total sleep deprivation and induced memory impairments [12,79–81]. Also, our lab has been able to produce significant memory loss using selective REM sleep deprivation for only 3 h [82]. Perhaps if the TSD was performed for a longer period, or if only REM sleep was deprived, we would have seen more significant changes. Taken together, the data highlight the somewhat imprecise effects of total sleep deprivation.

Although 3 h of TSD did not produce significant changes in either group, there were some differences that are important to discuss. First, even though our control animals did not have a significant reduction in Recognition Index after 3 h TSD, their average went from 66% to 57%, which is much nearer to chance performance [30]. This implies that the control group did encounter some impairment. Second, our depressive phenotype animals saw a slight increase in RI, going from 45% to 54%. Even though this was also insignificant, it does suggest that the animals may have had an altered response to the 3 h total sleep deprivation. This is contradictory to our hypothesis, which predicted that our LPP exposed animals would have an increased vulnerability to cognitive deficits induced by sleep deprivation. The contradictory result is interesting, however, in light of the antidepressant effects of sleep deprivation [22–24]. Additionally, there are studies that report enhanced memory formation and memory retrieval following brief periods of TSD [20,21]. This suggests that sleep deprivation can have different consequences across different settings and subjects. Perhaps depression involves an alteration in neurochemistry that causes sleep deprivation to enhance cognition and improve affective symptoms. There is some evidence that this could be the case, because antidepressants that selectively inhibit noradrenaline reuptake have been shown to improve cognition, and the antidepressant activity of sleep deprivation has been attributed to enhanced noradrenaline neurotransmission [83,84]. This would explain why TSD may have mitigated some of the effects of LPP exposure that produced NOR impairments. Further investigations can better illuminate the relationship between the cognitive enhancement and antidepressant activity of sleep deprivation.

We would like to acknowledge that it is possible that LPP exposure produces changes in sleep behavior that buffer against the effects of sleep deprivation. Photoperiod changes have been shown to affect the distribution of sleep, but have not been shown to alter total sleep amount [59,85–87]. Also, photoperiod changes do not appear to alter responses to sleep deprivation and do not change sleep homeostasis [86,88]. This indicates that our LPP exposed animals would not have any buffering against the cognitive effects of TSD, unless the timing of the critical window for memory consolidation was altered due to altered sleep distribution.

However, most rodents do not have clear consolidation of sleep and waking between light and dark phases even in normal conditions, so altered sleep distributions may not have large impacts on sleep-induced memory consolidation [89]. Additionally, it is important to note that most work on photoperiod-induced sleep changes has been done in diurnal animals, so little is known about the effects of long photoperiods on sleep in nocturnal animals [59,88,89]. Future work is necessary to deduce how long photoperiods interact with sleep and sleep deprivation in nocturnal animals.

It is possible that the cognitive deficits seen in long-photoperiod exposed rats are due to photoperiod shift and not to a depressive phenotype. Photoperiod shifts disrupt circadian processes, and it has been well-documented that circadian disruption produces cognitive deficits [90–93]. First, it should be noted that photoperiods were not “shifted” in the present study, since, during LPP exposure, the dark phase still began at the same time (6:00 pm), but ended early (9:00 pm instead of 6:00 am). Still, it is possible that the cognitive deficits seen were only due to circadian disruption. However, changes in photoperiod length have been proven to have drastically different effects depending on whether the photoperiod is shortened or lengthened [57]. If the effects of changes in photoperiod length were simply due to circadian disruption, one would expect that it would not make a difference if the photoperiod was longer or shorter. This suggests that the effects of changes in photoperiod length, including alterations in cognition, involve neural processes distinct from those involved in photoperiod shift and/or circadian disruption.

We acknowledge that this study did not address any behavioral differences that could have been seen between the rats’ light and dark cycles, because all tests were performed during the animals’ light cycle. It is possible that, in our LPP group, behavior during the light cycle was changed because the length of the light cycle was increased. Also, behavior during the dark cycle could have compensated or shown an alternate trend, because activity rhythms are changed by photoperiod variations [60, 61]. However, judging by our locomotion data, there were no activity differences between the LPP and NPP groups at time of testing. Additionally, locomotion was monitored at every stage of each NOR test (data not shown in manuscript), and no differences in locomotor activity were ever found. Similarly, we found no differences in object exploration. Our own observations of animals’ behavior in their home cages during testing also showed no observable behavioral differences. Therefore, we do not think that activity rhythms played a role in these results. In support of our conclusion, some other studies have shown that LPP exposure does not cause behavioral differences between the light and dark cycles [56,57]. Therefore, it is unlikely that the time at which testing was done played a large role in the results presented.

The results presented here highlight the breadth of cognitive dysfunction related to depression, and imply that depression-related cognitive deficits could span beyond the emotional and hippocampal spatial processes that have typically been investigated. This supports the idea that treating the cognitive aspects of depression is a necessity for any good therapeutic technique. These results also emphasize the complicated relationship between sleep loss and depression. Although disrupted sleep is reported in many depressed patients, total sleep deprivation can provide antidepressant effects. The data presented here indicate that these antidepressant effects could be tied to improvements in cognition. Clearly, a better understanding of how affective and cognitive symptoms of depression relate to each other would improve our ability to effectively treat this widespread and debilitating disease. Additionally, these results add to a growing body of literature blurring the line between “neurological” and “mental health” illnesses.

## Acknowledgments

This work is supported by National Institutes of Health Research Grant (MH59839). The content is solely the responsibility of the authors and does not necessarily represent the official

views of the National Institutes of Health. We thank Dr. Ralph Lydic, Dr. Helen Baghdoyan, and Dr. Robert Craft for critical discussions for this research. We thank Logan A. Chesney, Michael Totty, and Jennifer Garner for their technical assistance. AKB designed and performed research, analyzed data, and wrote the paper; SBS performed research and analyzed data; SD designed research, analyzed data, and co-wrote the paper.

## Author Contributions

**Conceptualization:** AKB SD.

**Data curation:** SD AKB.

**Formal analysis:** AKB SD.

**Funding acquisition:** SD.

**Investigation:** AKB SD SBS.

**Methodology:** AKB SD.

**Project administration:** SD AKB.

**Resources:** SD.

**Supervision:** SD.

**Validation:** AKB SD.

**Visualization:** AKB SD.

**Writing – original draft:** AKB SD.

**Writing – review & editing:** AKB SD.

## References

1. Austin MP, Mitchell P, Goodwin GM (2001) Cognitive deficits in depression: possible implications for functional neuropathology. *Br J Psychiatry* 178.
2. Hammar A, Ardal G (2009) Cognitive functioning in major depression—a summary. *Front Hum Neurosci* 3.
3. Marazziti D, Consoli G, Picchetti M, Carlini M, Faravelli L (2010) Cognitive impairment in major depression. *Eur J Pharmacol* 626.
4. Conradi HJ, Ormel J, Jonge P (2011) Presence of individual (residual) symptoms during depressive episodes and periods of remission: a 3-year prospective study. *Psychol Med* 41.
5. Gonda X, Pompili M, Serafini G, Carvalho AF, Rihmer Z, et al. (2015) The role of cognitive dysfunction in the symptoms and remission from depression. *Annals of General Psychiatry* 14: 1–7.
6. Finan PH, Quartana PJ, Smith MT (2015) The Effects of Sleep Continuity Disruption on Positive Mood and Sleep Architecture in Healthy Adults. *Sleep* 38: 1735–1742. doi: [10.5665/sleep.5154](https://doi.org/10.5665/sleep.5154) PMID: [26085289](https://pubmed.ncbi.nlm.nih.gov/26085289/)
7. Chan JW, Lam SP, Li SX, Yu MW, Chan NY, et al. (2014) Eveningness and insomnia: independent risk factors of nonremission in major depressive disorder. *Sleep* 37: 911–917. doi: [10.5665/sleep.3658](https://doi.org/10.5665/sleep.3658) PMID: [24790269](https://pubmed.ncbi.nlm.nih.gov/24790269/)
8. Cheng P, M DC, Chen CF, Hoffmann RF, Armitage R, et al. (2013) Sleep-disordered breathing in major depressive disorder. *J Sleep Res* 22: 459–462. doi: [10.1111/jsr.12029](https://doi.org/10.1111/jsr.12029) PMID: [23350718](https://pubmed.ncbi.nlm.nih.gov/23350718/)
9. Palmer CA, Alfano CA (2016) Sleep Architecture Relates to Daytime Affect and Somatic Complaints in Clinically-Anxious but not Healthy Children. *J Clin Child Adolesc Psychol*: 1–13.
10. Wang HY, Fu TS, Hsu SC, Hung CI (2016) Association of depression with sleep quality might be greater than that of pain intensity among outpatients with chronic low back pain. *Neuropsychiatr Dis Treat* 12: 1993–1998. doi: [10.2147/NDT.S110162](https://doi.org/10.2147/NDT.S110162) PMID: [27563244](https://pubmed.ncbi.nlm.nih.gov/27563244/)

11. Havekes R, Meerlo P, Abel T (2015) Animal studies on the role of sleep in memory: from behavioral performance to molecular mechanisms. *Curr Top Behav Neurosci* 25: 183–206. doi: [10.1007/7854\\_2015\\_369](https://doi.org/10.1007/7854_2015_369) PMID: [25680961](https://pubmed.ncbi.nlm.nih.gov/25680961/)
12. Palchykova S, Winsky-Sommerer R, Meerlo P, Durr R, Tobler I (2006) Sleep deprivation impairs object recognition in mice. *Neurobiol Learn Mem* 85: 263–271. doi: [10.1016/j.nlm.2005.11.005](https://doi.org/10.1016/j.nlm.2005.11.005) PMID: [16423541](https://pubmed.ncbi.nlm.nih.gov/16423541/)
13. Rolls A, Colas D, Adamantidis A, Carter M, Lanre-Amos T, et al. (2011) Optogenetic disruption of sleep continuity impairs memory consolidation. *Proc Natl Acad Sci U S A* 108: 13305–13310. doi: [10.1073/pnas.1015633108](https://doi.org/10.1073/pnas.1015633108) PMID: [21788501](https://pubmed.ncbi.nlm.nih.gov/21788501/)
14. Smith C (1996) Sleep states, memory processes and synaptic plasticity. *Behav Brain Res* 78: 49–56. PMID: [8793037](https://pubmed.ncbi.nlm.nih.gov/8793037/)
15. Guzman-Marin R, Ying Z, Suntsova N, Methippara M, Bashir T, et al. (2006) Suppression of hippocampal plasticity-related gene expression by sleep deprivation in rats. *J Physiol* 575: 807–819. doi: [10.1113/jphysiol.2006.115287](https://doi.org/10.1113/jphysiol.2006.115287) PMID: [16825295](https://pubmed.ncbi.nlm.nih.gov/16825295/)
16. Van Someren EJ, Cirelli C (2015) Disrupted Sleep: From Molecules to Cognition. 35: 13889–13895. doi: [10.1523/JNEUROSCI.2592-15.2015](https://doi.org/10.1523/JNEUROSCI.2592-15.2015) PMID: [26468189](https://pubmed.ncbi.nlm.nih.gov/26468189/)
17. Abdallah CG, Jackowski A, Sato JR, Mao X, Kang G, et al. (2015) Prefrontal cortical GABA abnormalities are associated with reduced hippocampal volume in major depressive disorder. *Eur Neuropsychopharmacol* 25: 1082–1090. doi: [10.1016/j.euroneuro.2015.04.025](https://doi.org/10.1016/j.euroneuro.2015.04.025) PMID: [25983019](https://pubmed.ncbi.nlm.nih.gov/25983019/)
18. Acosta-Pena E, Camacho-Abrego I, Melgarejo-Gutierrez M, Flores G, Drucker-Colin R, et al. (2015) Sleep deprivation induces differential morphological changes in the hippocampus and prefrontal cortex in young and old rats. *Synapse* 69: 15–25. doi: [10.1002/syn.21779](https://doi.org/10.1002/syn.21779) PMID: [25179486](https://pubmed.ncbi.nlm.nih.gov/25179486/)
19. Smith C (1995) Sleep states and memory processes. *Behav Brain Res* 69: 137–145. PMID: [7546305](https://pubmed.ncbi.nlm.nih.gov/7546305/)
20. Azogu I, de la Tremblaye PB, Dunbar M, Lebreton M, LeMarec N, et al. (2015) Acute sleep deprivation enhances avoidance learning and spatial memory and induces delayed alterations in neurochemical expression of GR, TH, DRD1, pCREB and Ki67 in rats. *Behav Brain Res* 279: 177–190. doi: [10.1016/j.bbr.2014.11.015](https://doi.org/10.1016/j.bbr.2014.11.015) PMID: [25433096](https://pubmed.ncbi.nlm.nih.gov/25433096/)
21. Takatsu-Coleman AL, Zanin KA, Patti CL, Zager A, Lopes-Silva LB, et al. (2013) Short-term sleep deprivation reinstates memory retrieval in mice: the role of corticosterone secretion. *Psychoneuroendocrinology* 38: 1967–1978. doi: [10.1016/j.psyneuen.2013.02.016](https://doi.org/10.1016/j.psyneuen.2013.02.016) PMID: [23545263](https://pubmed.ncbi.nlm.nih.gov/23545263/)
22. Dallaspezia S, Locatelli C, Lorenzi C, Pirovano A, Colombo C, et al. (2016) Sleep homeostatic pressure and PER3 VNTR gene polymorphism influence antidepressant response to sleep deprivation in bipolar depression. *J Affect Disord* 192: 64–69. doi: [10.1016/j.jad.2015.11.039](https://doi.org/10.1016/j.jad.2015.11.039) PMID: [26707349](https://pubmed.ncbi.nlm.nih.gov/26707349/)
23. Wolf E, Kuhn M, Norman C, Mainberger F, Maier JG, et al. (2015) Synaptic plasticity model of therapeutic sleep deprivation in major depression. *Sleep Med Rev* 30: 53–62. doi: [10.1016/j.smrv.2015.11.003](https://doi.org/10.1016/j.smrv.2015.11.003) PMID: [26803484](https://pubmed.ncbi.nlm.nih.gov/26803484/)
24. Tang Q, Li G, Wang A, Liu T, Feng S, et al. (2015) A systematic review for the antidepressant effects of sleep deprivation with repetitive transcranial magnetic stimulation. *BMC Psychiatry* 15: 282. doi: [10.1186/s12888-015-0674-8](https://doi.org/10.1186/s12888-015-0674-8) PMID: [26573324](https://pubmed.ncbi.nlm.nih.gov/26573324/)
25. Yu T, Guo M, Garza J, Rendon S, Sun XL, et al. (2011) Cognitive and neural correlates of depression-like behaviour in socially defeated mice: an animal model of depression with cognitive dysfunction. *Int J Neuropsychopharmacol* 14: 303–317. doi: [10.1017/S1461145710000945](https://doi.org/10.1017/S1461145710000945) PMID: [20735879](https://pubmed.ncbi.nlm.nih.gov/20735879/)
26. Henningsen K, Andreasen JT, Bouzinova EV, Jayatissa MN, Jensen MS, et al. (2009) Cognitive deficits in the rat chronic mild stress model for depression: relation to anhedonic-like responses. *Behav Brain Res* 198: 136–141. doi: [10.1016/j.bbr.2008.10.039](https://doi.org/10.1016/j.bbr.2008.10.039) PMID: [19038290](https://pubmed.ncbi.nlm.nih.gov/19038290/)
27. Bessa JM, Mesquita AR, Oliveira M, Pego JM, Cerqueira JJ, et al. (2009) A trans-dimensional approach to the behavioral aspects of depression. *Front Behav Neurosci* 3: 1. doi: [10.3389/neuro.08.001.2009](https://doi.org/10.3389/neuro.08.001.2009) PMID: [19194528](https://pubmed.ncbi.nlm.nih.gov/19194528/)
28. Robinson OJ, Cools R, Carlisi CO, Sahakian BJ, Drevets WC (2012) Ventral striatum response during reward and punishment reversal learning in unmedicated major depressive disorder. *Am J Psychiatry* 169: 152–159. doi: [10.1176/appi.ajp.2011.11010137](https://doi.org/10.1176/appi.ajp.2011.11010137) PMID: [22420038](https://pubmed.ncbi.nlm.nih.gov/22420038/)
29. Goeldner C, Ballard TM, Knoflach F, Wichmann J, Gatti S, et al. (2013) Cognitive impairment in major depression and the mGlu2 receptor as a therapeutic target. *Neuropharmacology* 64: 337–346. doi: [10.1016/j.neuropharm.2012.08.001](https://doi.org/10.1016/j.neuropharm.2012.08.001) PMID: [22992331](https://pubmed.ncbi.nlm.nih.gov/22992331/)
30. Antunes M, Biala G (2012) The novel object recognition memory: neurobiology, test procedure, and its modifications. *Cogn Process* 13: 93–110. doi: [10.1007/s10339-011-0430-z](https://doi.org/10.1007/s10339-011-0430-z) PMID: [22160349](https://pubmed.ncbi.nlm.nih.gov/22160349/)
31. Ennaceur A, Delacour J (1988) A new one-trial test for neurobiological studies of memory in rats. 1: Behavioral data. *Behav Brain Res* 31: 47–59. PMID: [3228475](https://pubmed.ncbi.nlm.nih.gov/3228475/)



32. Siopi E, Denizet M, Gabellec MM, de Chaumont F, Olivo-Marin JC, et al. (2016) Anxiety- and Depression-Like States Lead to Pronounced Olfactory Deficits and Impaired Adult Neurogenesis in Mice. *J Neurosci* 36: 518–531. doi: [10.1523/JNEUROSCI.2817-15.2016](https://doi.org/10.1523/JNEUROSCI.2817-15.2016) PMID: [26758842](https://pubmed.ncbi.nlm.nih.gov/26758842/)
33. Hill AS, Sahay A, Hen R (2015) Increasing Adult Hippocampal Neurogenesis is Sufficient to Reduce Anxiety and Depression-Like Behaviors. *Neuropsychopharmacology* 40: 2368–2378. doi: [10.1038/npp.2015.85](https://doi.org/10.1038/npp.2015.85) PMID: [25833129](https://pubmed.ncbi.nlm.nih.gov/25833129/)
34. Kim YK, Na KS, Myint AM, Leonard BE (2016) The role of pro-inflammatory cytokines in neuroinflammation, neurogenesis and the neuroendocrine system in major depression. *Prog Neuropsychopharmacol Biol Psychiatry* 64: 277–284. doi: [10.1016/j.pnpbp.2015.06.008](https://doi.org/10.1016/j.pnpbp.2015.06.008) PMID: [26111720](https://pubmed.ncbi.nlm.nih.gov/26111720/)
35. Mahar I, Bambico FR, Mechawar N, Nobrega JN (2014) Stress, serotonin, and hippocampal neurogenesis in relation to depression and antidepressant effects. *Neurosci Biobehav Rev* 38: 173–192. doi: [10.1016/j.neubiorev.2013.11.009](https://doi.org/10.1016/j.neubiorev.2013.11.009) PMID: [24300695](https://pubmed.ncbi.nlm.nih.gov/24300695/)
36. Tronel S, Charrier V, Sage C, Maitre M, Leste-Lasserre T, et al. (2015) Adult-born dentate neurons are recruited in both spatial memory encoding and retrieval. *Hippocampus* 25: 1472–1479. doi: [10.1002/hipo.22468](https://doi.org/10.1002/hipo.22468) PMID: [25913775](https://pubmed.ncbi.nlm.nih.gov/25913775/)
37. Moodley K, Minati L, Contarino V, Prioni S, Wood R, et al. (2015) Diagnostic differentiation of mild cognitive impairment due to Alzheimer's disease using a hippocampus-dependent test of spatial memory. *Hippocampus* 25: 939–951. doi: [10.1002/hipo.22417](https://doi.org/10.1002/hipo.22417) PMID: [25605659](https://pubmed.ncbi.nlm.nih.gov/25605659/)
38. Kaidah S, Soejono SK, Partadiredja G (2016) Exercise improves hippocampal estrogen and spatial memory of ovariectomized rats. *Bratisl Lek Listy* 117: 94–99. PMID: [26830040](https://pubmed.ncbi.nlm.nih.gov/26830040/)
39. Lee CH, Ryu J, Lee SH, Kim H, Lee I (2016) Functional cross-hemispheric shift between object-place paired associate memory and spatial memory in the human hippocampus. *Hippocampus* 26: 1061–1077. doi: [10.1002/hipo.22587](https://doi.org/10.1002/hipo.22587) PMID: [27009679](https://pubmed.ncbi.nlm.nih.gov/27009679/)
40. Rossato JI, Kohler CA, Radiske A, Bevilaqua LR, Cammarota M (2015) Inactivation of the dorsal hippocampus or the medial prefrontal cortex impairs retrieval but has differential effect on spatial memory reconsolidation. *Neurobiol Learn Mem* 125: 146–151. doi: [10.1016/j.nlm.2015.09.001](https://doi.org/10.1016/j.nlm.2015.09.001) PMID: [26348793](https://pubmed.ncbi.nlm.nih.gov/26348793/)
41. Oliveira AM, Hawk JD, Abel T, Havekes R (2010) Post-training reversible inactivation of the hippocampus enhances novel object recognition memory. *Learn Mem* 17: 155–160. doi: [10.1101/lm.1625310](https://doi.org/10.1101/lm.1625310) PMID: [20189960](https://pubmed.ncbi.nlm.nih.gov/20189960/)
42. Cohen SJ, Stackman RW Jr. (2015) Assessing rodent hippocampal involvement in the novel object recognition task. A review. *Behav Brain Res* 285: 105–117. doi: [10.1016/j.bbr.2014.08.002](https://doi.org/10.1016/j.bbr.2014.08.002) PMID: [25169255](https://pubmed.ncbi.nlm.nih.gov/25169255/)
43. Dere E, Huston JP, De Souza Silva MA (2007) The pharmacology, neuroanatomy and neurogenetics of one-trial object recognition in rodents. *Neurosci Biobehav Rev* 31: 673–704. doi: [10.1016/j.neubiorev.2007.01.005](https://doi.org/10.1016/j.neubiorev.2007.01.005) PMID: [17368764](https://pubmed.ncbi.nlm.nih.gov/17368764/)
44. Barker GR, Bird F, Alexander V, Warburton EC (2007) Recognition memory for objects, place, and temporal order: a disconnection analysis of the role of the medial prefrontal cortex and perirhinal cortex. *J Neurosci* 27: 2948–2957. doi: [10.1523/JNEUROSCI.5289-06.2007](https://doi.org/10.1523/JNEUROSCI.5289-06.2007) PMID: [17360918](https://pubmed.ncbi.nlm.nih.gov/17360918/)
45. Li S, Wang C, Wang W, Dong H, Hou P, et al. (2008) Chronic mild stress impairs cognition in mice: from brain homeostasis to behavior. *Life Sci* 82: 934–942. doi: [10.1016/j.lfs.2008.02.010](https://doi.org/10.1016/j.lfs.2008.02.010) PMID: [18402983](https://pubmed.ncbi.nlm.nih.gov/18402983/)
46. Orsetti M, Colella L, Dellarole A, Canonico PL, Ghi P (2007) Modification of spatial recognition memory and object discrimination after chronic administration of haloperidol, amitriptyline, sodium valproate or olanzapine in normal and anhedonic rats. *Int J Neuropsychopharmacol* 10: 345–357. doi: [10.1017/S1461145706006705](https://doi.org/10.1017/S1461145706006705) PMID: [16734936](https://pubmed.ncbi.nlm.nih.gov/16734936/)
47. Wu R, Shui L, Wang S, Song Z, Tai F (2016) Bilobalide alleviates depression-like behavior and cognitive deficit induced by chronic unpredictable mild stress in mice. *Behav Pharmacol* 27: 596–605. doi: [10.1097/FBP.000000000000252](https://doi.org/10.1097/FBP.000000000000252) PMID: [27509313](https://pubmed.ncbi.nlm.nih.gov/27509313/)
48. Femenia T, Magara S, DuPont CM, Lindskog M (2015) Hippocampal-Dependent Antidepressant Action of the H3 Receptor Antagonist Clobenpropit in a Rat Model of Depression. *Int J Neuropsychopharmacol* 18.
49. Dulawa SC, Hen R (2005) Recent advances in animal models of chronic antidepressant effects: the novelty-induced hypophagia test. *Neurosci Biobehav Rev* 29: 771–783. doi: [10.1016/j.neubiorev.2005.03.017](https://doi.org/10.1016/j.neubiorev.2005.03.017) PMID: [15890403](https://pubmed.ncbi.nlm.nih.gov/15890403/)
50. Zhu S, Shi R, Wang J, Wang JF, Li XM (2014) Unpredictable chronic mild stress not chronic restraint stress induces depressive behaviours in mice. *Neuroreport* 25: 1151–1155. doi: [10.1097/WNR.000000000000243](https://doi.org/10.1097/WNR.000000000000243) PMID: [25089805](https://pubmed.ncbi.nlm.nih.gov/25089805/)
51. Mouton M, Harvey BH, Cockeran M, Brink CB (2016) The long-term effects of methamphetamine exposure during pre-adolescence on depressive-like behaviour in a genetic animal model of depression. *Metab Brain Dis* 31: 63–74. doi: [10.1007/s11011-015-9765-y](https://doi.org/10.1007/s11011-015-9765-y) PMID: [26581673](https://pubmed.ncbi.nlm.nih.gov/26581673/)

52. Hattiangady B, Mishra V, Kodali M, Shuai B, Rao X, et al. (2014) Object location and object recognition memory impairments, motivation deficits and depression in a model of Gulf War illness. *Front Behav Neurosci* 8: 78. doi: [10.3389/fnbeh.2014.00078](https://doi.org/10.3389/fnbeh.2014.00078) PMID: [24659961](https://pubmed.ncbi.nlm.nih.gov/24659961/)
53. Bastos CP, Pereira LM, Ferreira-Vieira TH, Drumond LE, Massensini AR, et al. (2015) Object recognition memory deficit and depressive-like behavior caused by chronic ovariectomy can be transiently recovered by the acute activation of hippocampal estrogen receptors. *Psychoneuroendocrinology* 57: 14–25. doi: [10.1016/j.psyneuen.2015.03.020](https://doi.org/10.1016/j.psyneuen.2015.03.020) PMID: [25867995](https://pubmed.ncbi.nlm.nih.gov/25867995/)
54. Guo J, Chang L, Li C, Li M, Yan P, et al. (2016) SB203580 reverses memory deficits and depression-like behavior induced by microinjection of Abeta1-42 into hippocampus of mice. *Metab Brain Dis*.
55. Marszalek-Grabska M, Gibula-Bruzda E, Jenda M, Gawel K, Kotlinska JH (2016) Memantine improves memory impairment and depressive-like behavior induced by amphetamine withdrawal in rats. *Brain Res* 1642: 389–396. doi: [10.1016/j.brainres.2016.04.026](https://doi.org/10.1016/j.brainres.2016.04.026) PMID: [27085203](https://pubmed.ncbi.nlm.nih.gov/27085203/)
56. Becker A, Bilkei-Gorzo A, Michel K, Zimmer A (2010) Exposure of mice to long-light: a new animal model to study depression. *Eur Neuropsychopharmacol* 20: 802–812. doi: [10.1016/j.euroneuro.2010.07.009](https://doi.org/10.1016/j.euroneuro.2010.07.009) PMID: [20813511](https://pubmed.ncbi.nlm.nih.gov/20813511/)
57. Dulcis D, Jamshidi P, Leutgeb S, Spitzer NC (2013) Neurotransmitter switching in the adult brain regulates behavior. *Science* 340: 449–453. doi: [10.1126/science.1234152](https://doi.org/10.1126/science.1234152) PMID: [23620046](https://pubmed.ncbi.nlm.nih.gov/23620046/)
58. Kurlansik SL, Ibay AD (2012) Seasonal affective disorder. *Am Fam Physician* 86: 1037–1041. PMID: [23198671](https://pubmed.ncbi.nlm.nih.gov/23198671/)
59. Palchykova S, Deboer T, Tobler I (2003) Seasonal aspects of sleep in the Djungarian hamster. *BMC Neurosci* 4: 9. doi: [10.1186/1471-2202-4-9](https://doi.org/10.1186/1471-2202-4-9) PMID: [12756056](https://pubmed.ncbi.nlm.nih.gov/12756056/)
60. Warner A, Jethwa PH, Wyse CA, l'Anson H, Brameld JM, et al. (2010) Effects of photoperiod on daily locomotor activity, energy expenditure, and feeding behavior in a seasonal mammal. *Am J Physiol Regul Integr Comp Physiol* 298: R1409–1416. doi: [10.1152/ajpregu.00279.2009](https://doi.org/10.1152/ajpregu.00279.2009) PMID: [20200136](https://pubmed.ncbi.nlm.nih.gov/20200136/)
61. Cambras T, Chiesa J, Araujo J, Diez-Noguera A (2004) Effects of photoperiod on rat motor activity rhythm at the lower limit of entrainment. *J Biol Rhythms* 19: 216–225. doi: [10.1177/0748730404264201](https://doi.org/10.1177/0748730404264201) PMID: [15155008](https://pubmed.ncbi.nlm.nih.gov/15155008/)
62. Datta S, Knapp CM, Koul-Tiwari R, Barnes A (2015) The homeostatic regulation of REM sleep: A role for localized expression of brain-derived neurotrophic factor in the brainstem. *Behav Brain Res* 292: 381–392. doi: [10.1016/j.bbr.2015.06.038](https://doi.org/10.1016/j.bbr.2015.06.038) PMID: [26146031](https://pubmed.ncbi.nlm.nih.gov/26146031/)
63. Dix SL, Aggleton JP (1999) Extending the spontaneous preference test of recognition: evidence of object-location and object-context recognition. *Behav Brain Res* 99: 191–200. PMID: [10512585](https://pubmed.ncbi.nlm.nih.gov/10512585/)
64. Chen L, Tian S, Ke J (2014) Rapid eye movement sleep deprivation disrupts consolidation but not reconsolidation of novel object recognition memory in rats. *Neurosci Lett* 563: 12–16. doi: [10.1016/j.neulet.2014.01.024](https://doi.org/10.1016/j.neulet.2014.01.024) PMID: [24472565](https://pubmed.ncbi.nlm.nih.gov/24472565/)
65. Onalapo OJ, Onalapo AY, Akanmu MA, Olayiwola G (2015) Caffeine/sleep-deprivation interaction in mice produces complex memory effects. *Ann Neurosci* 22: 139–149. doi: [10.5214/ans.0972.7531.220304](https://doi.org/10.5214/ans.0972.7531.220304) PMID: [26130922](https://pubmed.ncbi.nlm.nih.gov/26130922/)
66. Palchykova S, Crestani F, Meerlo P, Tobler I (2006) Sleep deprivation and daily torpor impair object recognition in Djungarian hamsters. *Physiol Behav* 87: 144–153. doi: [10.1016/j.physbeh.2005.09.005](https://doi.org/10.1016/j.physbeh.2005.09.005) PMID: [16253296](https://pubmed.ncbi.nlm.nih.gov/16253296/)
67. Castagne V, Moser P, Roux S, Porsolt RD (2011) Rodent models of depression: forced swim and tail suspension behavioral despair tests in rats and mice. *Curr Protoc Neurosci* Chapter 8: Unit 8.10A.
68. Slattery DA, Cryan JF (2012) Using the rat forced swim test to assess antidepressant-like activity in rodents. *Nat Protoc* 7: 1009–1014. doi: [10.1038/nprot.2012.044](https://doi.org/10.1038/nprot.2012.044) PMID: [22555240](https://pubmed.ncbi.nlm.nih.gov/22555240/)
69. Lopez-Rubalcava C, Lucki I (2000) Strain differences in the behavioral effects of antidepressant drugs in the rat forced swimming test. *Neuropsychopharmacology* 22: 191–199. doi: [10.1016/S0893-133X\(99\)00100-1](https://doi.org/10.1016/S0893-133X(99)00100-1) PMID: [10649831](https://pubmed.ncbi.nlm.nih.gov/10649831/)
70. Mokoena ML, Harvey BH, Viljoen F, Ellis SM, Brink CB (2015) Ozone exposure of Flinders Sensitive Line rats is a rodent translational model of neurobiological oxidative stress with relevance for depression and antidepressant response. *Psychopharmacology (Berl)* 232: 2921–2938.
71. Nam H, Kerman IA (2016) A2 noradrenergic neurons regulate forced swim test immobility. *Physiol Behav* 165: 339–349. doi: [10.1016/j.physbeh.2016.08.020](https://doi.org/10.1016/j.physbeh.2016.08.020) PMID: [27553574](https://pubmed.ncbi.nlm.nih.gov/27553574/)
72. Carlezon WA Jr., Rohan ML, Mague SD, Meloni EG, Parsegian A, et al. (2005) Antidepressant-like effects of cranial stimulation within a low-energy magnetic field in rats. *Biol Psychiatry* 57: 571–576. doi: [10.1016/j.biopsych.2004.12.011](https://doi.org/10.1016/j.biopsych.2004.12.011) PMID: [15780843](https://pubmed.ncbi.nlm.nih.gov/15780843/)
73. Morici JF, Bekinshtein P, Weisstaub NV (2015) Medial prefrontal cortex role in recognition memory in rodents. *Behav Brain Res* 292: 241–251. doi: [10.1016/j.bbr.2015.06.030](https://doi.org/10.1016/j.bbr.2015.06.030) PMID: [26115848](https://pubmed.ncbi.nlm.nih.gov/26115848/)

74. Ennaceur A, Michalikova S, Chazot PL (2009) Do rats really express neophobia towards novel objects? Experimental evidence from exposure to novelty and to an object recognition task in an open space and an enclosed space. *Behav Brain Res* 197: 417–434. doi: [10.1016/j.bbr.2008.10.007](https://doi.org/10.1016/j.bbr.2008.10.007) PMID: [18992282](https://pubmed.ncbi.nlm.nih.gov/18992282/)
75. Walf AA, Frye CA (2007) The use of the elevated plus maze as an assay of anxiety-related behavior in rodents. *Nat Protoc* 2: 322–328. doi: [10.1038/nprot.2007.44](https://doi.org/10.1038/nprot.2007.44) PMID: [17406592](https://pubmed.ncbi.nlm.nih.gov/17406592/)
76. He J, Hsueh H, He Y, Kastin AJ, Wang Y, et al. (2014) Sleep restriction impairs blood-brain barrier function. *J Neurosci* 34: 14697–14706. doi: [10.1523/JNEUROSCI.2111-14.2014](https://doi.org/10.1523/JNEUROSCI.2111-14.2014) PMID: [25355222](https://pubmed.ncbi.nlm.nih.gov/25355222/)
77. Kim Y, Chen L, McCarley RW, Strecker RE (2013) Sleep allostasis in chronic sleep restriction: the role of the norepinephrine system. *Brain Res* 1531: 9–16. doi: [10.1016/j.brainres.2013.07.048](https://doi.org/10.1016/j.brainres.2013.07.048) PMID: [23916734](https://pubmed.ncbi.nlm.nih.gov/23916734/)
78. Lima IL, Rodrigues AF, Bergamaschi CT, Campos RR, Hirata AE, et al. (2014) Chronic sleep restriction during pregnancy—repercussion on cardiovascular and renal functioning of male offspring. *PLoS One* 9: e113075. doi: [10.1371/journal.pone.0113075](https://doi.org/10.1371/journal.pone.0113075) PMID: [25405471](https://pubmed.ncbi.nlm.nih.gov/25405471/)
79. Kreutzmann JC, Havekes R, Abel T, Meerlo P (2015) Sleep deprivation and hippocampal vulnerability: changes in neuronal plasticity, neurogenesis and cognitive function. *Neuroscience* 309: 173–190. doi: [10.1016/j.neuroscience.2015.04.053](https://doi.org/10.1016/j.neuroscience.2015.04.053) PMID: [25937398](https://pubmed.ncbi.nlm.nih.gov/25937398/)
80. Tudor JC, Davis EJ, Peixoto L, Wimmer ME, van Tilborg E, et al. (2016) Sleep deprivation impairs memory by attenuating mTORC1-dependent protein synthesis. *Sci Signal* 9: ra41. doi: [10.1126/scisignal.aad4949](https://doi.org/10.1126/scisignal.aad4949) PMID: [27117251](https://pubmed.ncbi.nlm.nih.gov/27117251/)
81. Xie M, Li C, He C, Yang L, Tan G, et al. (2016) Short-term sleep deprivation disrupts the molecular composition of ionotropic glutamate receptors in entorhinal cortex and impairs the rat spatial reference memory. *Behav Brain Res* 300: 70–76. doi: [10.1016/j.bbr.2015.10.002](https://doi.org/10.1016/j.bbr.2015.10.002) PMID: [26455878](https://pubmed.ncbi.nlm.nih.gov/26455878/)
82. Datta S, O'Malley MW (2013) Fear extinction memory consolidation requires potentiation of pontine-wave activity during REM sleep. *J Neurosci* 33: 4561–4569. doi: [10.1523/JNEUROSCI.5525-12.2013](https://doi.org/10.1523/JNEUROSCI.5525-12.2013) PMID: [23467372](https://pubmed.ncbi.nlm.nih.gov/23467372/)
83. Feltmann K, Konradsson-Geuken A, De Bundel D, Lindskog M, Schilström B (2015) Antidepressant drugs specifically inhibiting noradrenaline reuptake enhance recognition memory in rats. *Behav Neurosci* 129: 701–708. doi: [10.1037/bne0000100](https://doi.org/10.1037/bne0000100) PMID: [26501179](https://pubmed.ncbi.nlm.nih.gov/26501179/)
84. Hipolide DC, Moreira KM, Barlow KB, Wilson AA, Nobrega JN, et al. (2005) Distinct effects of sleep deprivation on binding to norepinephrine and serotonin transporters in rat brain. *Prog Neuropsychopharmacol Biol Psychiatry* 29: 297–303. doi: [10.1016/j.pnpbp.2004.11.015](https://doi.org/10.1016/j.pnpbp.2004.11.015) PMID: [15694238](https://pubmed.ncbi.nlm.nih.gov/15694238/)
85. Deboer T, Vyazovskiy VV, Tobler I (2000) Long photoperiod restores the 24-h rhythm of sleep and EEG slow-wave activity in the Djungarian hamster (*Phodopus sungorus*). *J Biol Rhythms* 15: 429–436. PMID: [11039920](https://pubmed.ncbi.nlm.nih.gov/11039920/)
86. Franken P, Tobler I, Borbely AA (1995) Varying photoperiod in the laboratory rat: profound effect on 24-h sleep pattern but no effect on sleep homeostasis. *Am J Physiol* 269: R691–701. PMID: [7573572](https://pubmed.ncbi.nlm.nih.gov/7573572/)
87. Stephenson R, Lim J, Famina S, Caron AM, Dowse HB (2012) Sleep-wake behavior in the rat: ultradian rhythms in a light-dark cycle and continuous bright light. *J Biol Rhythms* 27: 490–501. doi: [10.1177/0748730412461247](https://doi.org/10.1177/0748730412461247) PMID: [23223374](https://pubmed.ncbi.nlm.nih.gov/23223374/)
88. Ashley NT, Walton JC, Haim A, Zhang N, Prince LA, et al. (2013) Sleep deprivation attenuates endotoxin-induced cytokine gene expression independent of day length and circulating cortisol in male Siberian hamsters (*Phodopus sungorus*). *J Exp Biol* 216: 2581–2586. doi: [10.1242/jeb.083832](https://doi.org/10.1242/jeb.083832) PMID: [23531821](https://pubmed.ncbi.nlm.nih.gov/23531821/)
89. Yasenkov R, Deboer T (2012) Circadian modulation of sleep in rodents. *Prog Brain Res* 199: 203–218. doi: [10.1016/B978-0-444-59427-3.00012-5](https://doi.org/10.1016/B978-0-444-59427-3.00012-5) PMID: [22877667](https://pubmed.ncbi.nlm.nih.gov/22877667/)
90. Gaggioni G, Maquet P, Schmidt C, Dijk DJ, Vandewalle G (2014) Neuroimaging, cognition, light and circadian rhythms. *Front Syst Neurosci* 8: 126. doi: [10.3389/fnsys.2014.00126](https://doi.org/10.3389/fnsys.2014.00126) PMID: [25071478](https://pubmed.ncbi.nlm.nih.gov/25071478/)
91. Luik AI, Zuurbier LA, Hofman A, Van Someren EJ, Ikram MA, et al. (2015) Associations of the 24-h activity rhythm and sleep with cognition: a population-based study of middle-aged and elderly persons. *Nat Commun* 16: 850–855.
92. McDonald RJ, Zelinski EL, Keeley RJ, Sutherland D, Fehr L, et al. (2013) Multiple effects of circadian dysfunction induced by photoperiod shifts: alterations in context memory and food metabolism in the same subjects. *Physiol Behav* 118: 14–24. doi: [10.1016/j.physbeh.2013.04.010](https://doi.org/10.1016/j.physbeh.2013.04.010) PMID: [23660277](https://pubmed.ncbi.nlm.nih.gov/23660277/)
93. Zelinski EL, Tyndall AV, Hong NS, McDonald RJ (2013) Persistent impairments in hippocampal, dorsal striatal, and prefrontal cortical function following repeated photoperiod shifts in rats. *Exp Brain Res* 224: 125–139. doi: [10.1007/s00221-012-3293-3](https://doi.org/10.1007/s00221-012-3293-3) PMID: [23099547](https://pubmed.ncbi.nlm.nih.gov/23099547/)
